# Supplementary material for: Testing an optimality-based model of rooting zone water storage capacity in temperate forests
Source: Copernicus journal article supplement (doi:10.5194/hess-22-4097-2018), 2018-07-30
Supplement: Supplementary file 1 [file hess-22-4097-2018-supplement.zip]

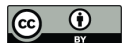

## *Supplement of*

# **Testing an optimality-based model of rooting zone water storage capacity in temperate forests**

**Matthias J. R. Speich et al.**

*Correspondence to:* Matthias J. R. Speich ([matthias.speich@wsl.ch](mailto:matthias.speich@wsl.ch))

- [hess-22-4097-2018-supplement-title-page.pdf](#)
- [s1.R](#)
- [s2.docx](#)

The copyright of individual parts of the supplement might differ from the CC BY 4.0 License.
